# Supplementary material
Source: PubMed Central journal article supplement (PMC6052223)
Supplement: supp_RA118.003244_137139_2_supp_141100_p94vh5.pdf [file supp_RA118.003244_137139_2_supp_141100_p94vh5.pdf]

Discovery of a new Pro-Pro endopeptidase, PPEP-2, provides mechanistic insights into the differences in substrate specificity within the PPEP family

**Oleg I. Klychnikov<sup>1</sup>, Tatiana M. Shamorkina<sup>2</sup>, Stephen D. Weeks<sup>1</sup>, Hans C. van Leeuwen<sup>3</sup>, Jeroen Corver<sup>3</sup>, Jan W. Drijfhout<sup>4</sup>, Peter A. van Veelen<sup>2</sup>, Nikolai N. Sluchanko<sup>5,6</sup>, Sergei V. Strelkov<sup>1</sup>, Paul J. Hensbergen<sup>2\*</sup>**

Two supporting tables: Table S1-2

Six supporting figures: Fig. S1-7

**Table S1:** List of PPEP-1 homologs from the *Paenibacillus* genus used for alignment (Fig. S1). All sequences were retrieved from the NCBI database and NCBI Reference / Genbank IDs are indicated. VMSP: VWFA, Muchp, Surface-layer homology Protein (see text for explanation). The sequences of OAB34809 and OAB31907 are identical and therefore combined in Fig. S1. From *Paenibacillus* sp. KS1 no full VMSP sequence could be retrieved. For *Paenibacillus terrigena* DSM 21567 genes were not automatically annotated. \* PCR analysis followed by Sanger sequencing demonstrated that *P. alvei* DSM29 genes PAV\_1c07810 (encoding EJW19794) and PAV\_1c07820 (encoding EJW19795) form one single open reading frame encoding 1335 amino acids.

| <b>Species</b>                                          | <b>PPEP</b> (NCBI Reference / Genbank ID) | <b>VMSP</b> ( NCBI Reference / Genbank ID) | <b>Contig</b> (NCBI Reference / Genbank ID) |
|---------------------------------------------------------|-------------------------------------------|--------------------------------------------|---------------------------------------------|
| <i>Paenibacillus alvei</i> A6-6i                        | EPY14168                                  | EPY11279/<br>EPY14167                      | ATMS01000012<br>ATMS01000059                |
| <i>Paenibacillus alvei</i> TS-15                        | EPY03961                                  | EPY03960                                   | NZ_ATMT01000102                             |
| <i>Paenibacillus alvei</i> DSM 29                       | EJW19796                                  | EJW19794/EJW19795*                         | AMBZ01000001                                |
| <i>Paenibacillus alvei</i> E194                         | WP_044353226                              | WP_052648330                               | NZ_JMDX01000004                             |
| <i>Paenibacillus</i> sp. NAIST15-1                      | GAV13913                                  | GAV13912                                   | BBYF01000009                                |
| <i>Paenibacillus</i> sp. cl6col                         | SDF26896                                  | SDF26925                                   | FNAZ01000004                                |
| <i>Paenibacillus</i> sp. KS1                            | OBY76659                                  | x                                          | MAIS01000128                                |
| <i>Paenibacillus</i> sp. UNC217MF                       | WP_028533504                              | WP_028533505                               | NZ_KK366029                                 |
| <i>Paenibacillus popilliae</i> ATCC 14706               | GAC42002                                  | GAC42003                                   | BALG01000064                                |
| <i>Paenibacillus dendritiformis</i> C454                | EHQ62738                                  | EHQ62737                                   | AHKH01000016                                |
| <i>Paenibacillus</i> sp. OSY-SE                         | WP_026011046                              | WP_036704090                               | NZ_ALKF01000177                             |
| <i>Paenibacillus yonginensis</i> DCY84                  | ANS76224                                  | ANS76225                                   | CP014167                                    |
| <i>Paenibacillus macquariensis</i> subsp. defensor      | OAB34809                                  | OAB34808                                   | LVJG01000033                                |
| <i>Paenibacillus macquariensis</i> Macquariensis        | OAB31907                                  | OAB31908                                   | LVJF01000029                                |
| <i>Paenibacillus</i> sp. P1XP2                          | KHF34792                                  | KHF34791                                   | JRNV01000019                                |
| <i>Paenibacillus phoceensis</i> (MT24)                  | WP_068785363                              | WP_068784776                               | NZ_FCOQ01000018                             |
| <i>Paenibacillus</i> sp. GM2 (numidis)                  | WP_068778763                              | WP_068778762                               | NZ_CTEK01000019                             |
| <i>Paenibacillus macerans</i> strain 8244               | KFN10106                                  | KFN10123                                   | JMQA01000020                                |
| <i>Paenibacillus antibioticophila</i> sp. nov. GD11     | WP_044478267                              | WP_044478266                               | NZ_HG005139                                 |
| <i>Paenibacillus thiaminolyticus</i> strain NRRL B-4156 | WP_087440397                              | WP_087440396                               | NDGK01000005                                |
| <i>Paenibacillus apiarius</i> strain NRRL B-23460       | WP_087434869                              | WP_087434735                               | NDGJ01000039.1                              |
| <i>Paenibacillus terrigena</i> DSM 21567                | -                                         | -                                          | ARGP01000031                                |

**Table S2:** Overall SAXS-derived hydrodynamic parameters of PPEP-1 and PPEP-2

|                                                           | <b>PPEP-1</b>        | <b>PPEP-2</b>        |
|-----------------------------------------------------------|----------------------|----------------------|
| <b>Monomeric Mw (calculated from amino acid sequence)</b> | 21.6 kDa             | 21.1 kDa             |
| <b>Number of residues</b>                                 | 195                  | 191                  |
| <b>Rg (reciprocal space)</b>                              | 17.33±0.03 nm        | 17.61±0.05 nm        |
| <b>Rg (real space)</b>                                    | 17.32±0.03 nm        | 17.63±0.04 nm        |
| <b>Porod Volume</b>                                       | 30.7 nm <sup>3</sup> | 32.8 nm <sup>3</sup> |
| <b>Mw Porod</b>                                           | 19.4 kDa             | 20.5 kDa             |
| <b>Dmax</b>                                               | 5.95 nm              | 5.90 nm              |

|                         |           |            |            |           |          |         |              |
|-------------------------|-----------|------------|------------|-----------|----------|---------|--------------|
|                         | 30        | 40         | 50         | 60        | 70       | 80      | 90           |
| C.difficile_630_PPEP1   | DSTTIQQNK | DTLSQIVVFP | PTGNDYKNE  | ANAMVNR   | LANIDGKY | LNALKDN | NNLKIKLLS    |
| P.alvei_DSM29_PPEP2     | .....     | QEQSILDKL  | VVLPSGEYN  | HSAAAMKQ  | RLEKIP   | TSILDAL | YSKGVKIKLT   |
| P.alvei_TS_15           | .....     | QEQTILDKL  | VVLPSGDYNR | SEAAAMKQ  | RLEKIP   | TSVNLAL | YSKGVKIKLT   |
| P.alvei_A66ix           | .....     | QEQTILDKL  | VVLPSGDYNR | SEAAAMKQ  | RLEKIP   | TSVNLAL | YSKGVKIKLT   |
| P.spec_KS1              | .....     | QEQTILDKL  | VVLPSGDYNR | SEAAAMKQ  | RLEKIP   | TSVNLAL | YSKGVKIKLT   |
| P.spec_UNC217MF         | .....     | QEQTILDKL  | VVLPSGDYNR | SEAAAMKQ  | RLEKFP   | TSVNLAL | YSKGVKIKLT   |
| P.spec_NAIST15          | .....     | QEQTILDKL  | VVLPSGDYNR | SEAAAMKQ  | RLEKIP   | TSVNLAL | YSKGVKIKLT   |
| P.spec_cl6col           | .....     | QEQTILDKL  | VVLPSGDYNR | SEAAAMKQ  | RLEKFP   | TSVNLAL | YSKGVKIKLT   |
| P.alvei_E194            | .....     | QEQTILDKL  | VVLPSGDYNR | SEAAAMKQ  | RLEKIP   | TSVNLAL | YSKGVKIKLT   |
| P.dendritiformis_C454   | .....     | EDAIIDKL   | VVLPSDYNVK | EAAAMKQ   | RLEKIP   | ARILSM  | LYDKGVKIKLT  |
| P.thiaminolyticus_B4156 | .....     | EDAIINKL   | VVLPSSEYNV | KEAAAMKQ  | RLEKIP   | ARILNQ  | LYDKGVKIKLT  |
| P.popilliae_ATCC14706   | .....     | EGALPDQ    | LVLPTGDYNV | KEAAEMMER | RLEKIP   | APILKT  | LADKGVKIKLT  |
| P.terrigena_DSM21567    | .....     | ADNTIDK    | LVLPSGDYNV | SEAAAMKQ  | RLEKIP   | ANILNT  | LFDKGVKIKLT  |
| P.apariarius_B23460     | .....     | EDSTIDR    | LVLPSGDYNV | NEAATAMKQ | RLEKIP   | ANILS   | ALFNKGVKIKLT |
| P.spec_OSY_SE           | .....     | QDAN       | SFISSMIQ   | LP        | TG       | SYNTKE  | QAQAMIG      |
| P.yonginensis_DCY84     | .....     | RESVI      | QQLVLP     | TG        | SYNAKE   | AAAMMGR | LERIPAPV     |
| P.spec_P1XP2            | .....     | QS         | SLLDQ      | LVLPTG    | SYNTKE   | ASAMIGR | EKIPAPIL     |
| P.macquariensis_mac_def | .....     | .....      | .....      | .....     | .....    | .....   | .....        |
| P.spec_GM2              | .....     | DT         | SLLK       | DIVL      | POG      | NDYK    | LEADK        |
| P.antibioticophila_GD11 | .....     | ETSAKLS    | SD         | ELLSQ     | IVL      | PKSDY   | NKASADK      |
| P.macerans              | .....     | DD         | SQ         | SLVND     | IVL      | PKDDF   | NKSDAGK      |
| P.phoceensis_MT24       | .....     | QEDNH      | NLV        | SQ        | LVL      | LP      | QDHYNEA      |

|                         |     |       |       |       |     |         |      |       |       |
|-------------------------|-----|-------|-------|-------|-----|---------|------|-------|-------|
|                         | 100 | 110   | *     | 120   | 130 | 140     | *    | 150   | 160   |
| C.difficile_630_PPEP1   | GVP | PKGWE | CTG   | KTWDD | VPG | LGGST   | VALR | IGFS  | NKCKG |
| P.alvei_DSM29_PPEP2     | GVP | PRGWE | CTGLT | WDDV  | PGV | SERVVAV | RIGY | SEKCK | GHNS  |
| P.alvei_TS_15           | GVP | PRGWE | CTGLT | WDDV  | PGV | SERVVAV | RIGY | SEKCK | GHNS  |
| P.alvei_A66ix           | GVP | PRGWE | CTGLT | WDDV  | PGV | SERVVAV | RIGY | SEKCK | GHNS  |
| P.spec_KS1              | GVP | PRGWE | CTGLT | WDDV  | PGV | SERVVAV | RIGY | SEKCK | GHNS  |
| P.spec_UNC217MF         | GVP | PRGWE | CTGLT | WDDV  | PGV | SERVVAV | RIGY | SEKCK | GHNS  |
| P.spec_NAIST15          | GVP | PRGWE | CTGLT | WDDV  | PGV | SERVVAV | RIGY | SEKCK | GHNS  |
| P.spec_cl6col           | GVP | PRGWE | CTGLT | WDDV  | PGV | SERVVAV | RIGY | SEKCK | GHNS  |
| P.alvei_E194            | GVP | PRGWE | CTGLT | WDDV  | PGV | SERVVAV | RIGY | SEKCK | GHNS  |
| P.dendritiformis_C454   | GVP | PRGWE | CTG   | M     | T   | W       | D    | V     | P     |
| P.thiaminolyticus_B4156 | GVP | PRGWE | CTG   | M     | T   | W       | D    | V     | P     |
| P.popilliae_ATCC14706   | GVP | PRGWE | CTG   | M     | T   | W       | D    | V     | P     |
| P.terrigena_DSM21567    | GVP | PRGWE | CTG   | M     | T   | W       | D    | V     | P     |
| P.apariarius_B23460     | GVP | PRGWE | CTG   | M     | T   | W       | D    | V     | P     |
| P.spec_OSY_SE           | GVP | PRGWE | CTG   | M     | T   | W       | D    | V     | P     |
| P.yonginensis_DCY84     | GVP | PRGWE | CTG   | M     | T   | W       | D    | V     | P     |
| P.spec_P1XP2            | GVP | PRGWE | CTG   | M     | T   | W       | D    | V     | P     |
| P.macquariensis_mac_def | GVP | PRGWE | CTG   | M     | T   | W       | D    | V     | P     |
| P.spec_GM2              | GVP | PRGWE | CTG   | M     | T   | W       | D    | V     | P     |
| P.antibioticophila_GD11 | GVP | PRGWE | CTG   | M     | T   | W       | D    | V     | P     |
| P.macerans              | GVP | PRGWE | CTG   | M     | T   | W       | D    | V     | P     |
| P.phoceensis_MT24       | GVP | PRGWE | CTG   | M     | T   | W       | D    | V     | P     |

|                         |     |       |       |        |        |
|-------------------------|-----|-------|-------|--------|--------|
|                         | 170 | 180   | 190   | 200    | 210    |
| C.difficile_630_PPEP1   | AKR | GRS   | LG    | NVNYL  | GVYP   |
| P.alvei_DSM29_PPEP2     | NRE | ASV   | KYK   | GDGY   | VSAVPT |
| P.alvei_TS_15           | NRE | ASIKY | KGDGY | VSTYPT | TEYFAE |
| P.alvei_A66ix           | NRE | ASV   | KYK   | GDGY   | VSMYPT |
| P.spec_KS1              | NRE | ASV   | KYK   | GDGY   | VSTYPT |
| P.spec_UNC217MF         | NRE | ASV   | KYK   | GDGY   | VSTYPT |
| P.spec_NAIST15          | NRE | ASV   | KYK   | GDGY   | VSTYPT |
| P.spec_cl6col           | NRE | ASV   | KYK   | GDGY   | VSTYPT |
| P.alvei_E194            | NRE | ASV   | KYK   | GDGY   | VSTYPT |
| P.dendritiformis_C454   | NOE | ANV   | N     | NGDGY  | VSVHPT |
| P.thiaminolyticus_B4156 | NOE | ANIKY | NGDGY | VSVHPT | TEYFAE |
| P.popilliae_ATCC14706   | NOE | ANIN  | Y     | EDGY   | VLAYPV |
| P.terrigena_DSM21567    | TKR | AAS   | N     | YH     | DGYVSA |
| P.apariarius_B23460     | NAE | ANV   | KY    | SGDGY  | VSVQPT |
| P.spec_OSY_SE           | NAE | ASV   | KY    | SGDGY  | VSVQPT |
| P.yonginensis_DCY84     | NRE | ASV   | N     | YK     | GDGY   |
| P.spec_P1XP2            | NOE | AAA   | E     | F      | NDGY   |
| P.macquariensis_mac_def | NRE | ASV   | N     | YK     | GDGY   |
| P.spec_GM2              | KRE | A     | D     | I      | Y      |
| P.antibioticophila_GD11 | KRE | A     | D     | I      | Y      |
| P.macerans              | KRE | A     | N     | D      | Y      |
| P.phoceensis_MT24       | KSE | A     | N     | D      | Y      |

Figure S1: Sequence alignment of *C. difficile* PPEP-1 with its homologs from *Paenibacillus*.

The multiple alignment was performed using ClustalW Omega, and the final output was processed using the program ESPrnt 3.0. Signal sequences as predicted by SignalP4 were removed from all proteins. The numbering refers to PPEP-2 from *P. alvei* DSM29. Identical residues are in white letters with red background, similar residues are in black letters with yellow background, varied residues are in black letters, and dots represent gaps. Designations: P, *Paenibacillus*; C, *Clostridium*. \*: residues which form a salt bridge in PPEP-2 (see text regarding Figure 5b for further details).

A

| Species                           | PPEP cleavage sites                                              | Amino acids |
|-----------------------------------|------------------------------------------------------------------|-------------|
| <i>P. alvei</i> _TS-15            | SSSYYPSSK <b>PLPPVP</b> <b>PLPPVR</b> -KLETQYHYNYINGYPDG         | 1226 - 1263 |
| <i>P. alvei</i> _A66ix            | STSYYPSSK <b>PLPPVP</b> <b>PLPPVR</b> -KLETQYHYNYINGYPDG         | 614 - 651   |
| <i>P. spec</i> _UNC217MF          | STSYYPSSK <b>PLPPVP</b> <b>PLPPVR</b> -KLETQYHYNYINGYPDG         | 1287 - 1324 |
| <i>P. spec</i> _NAIST15_1         | STSYYPSSK <b>PLPPVP</b> <b>PLPPVR</b> -KLETQYHYNYINGYPDG         | 1218 - 1255 |
| <i>P. spec</i> _cl6c01            | STSYYPSSK <b>PLPPVP</b> <b>PLPPVR</b> -KLETQYHYNYINGYPDG         | 1220 - 1257 |
| <i>P. alvei</i> _E194             | SSK <b>PLPPVR</b> <b>PLPPVP</b> <b>PLPPVR</b> -KLETQYHYNYINGYPDG | 1159 - 1196 |
| <i>P. alvei</i> _DSM29            | SSK-- <b>PLPPVR</b> PVQ <b>PLPPVR</b> -KLETQYHYNYINGYPDG         | 1101 - 1135 |
| <i>P. dendritiformis</i> _C454    | SYTITPSPK <b>PLPPVP</b> <b>PLPPVR</b> PKLDMENHYNYINGYPDG         | 461 - 499   |
| <i>P. thiaminolyticus</i> _B4156  | TTTITPSPK <b>PLPPVP</b> <b>PLPPVR</b> PKLDMENHYNYINGYPDG         | 1447 - 1486 |
| <i>P. popilliae</i> _ATCC14706    | SSTITPSKPL-- <b>PLPPVR</b> PKLDMENHSNYINGYPDG                    | 855 - 890   |
| <i>P. terrigena</i> _DSM21567     | STPT <b>PLPPV</b> <b>PLPPVP</b> <b>PLPPVR</b> PQLEKDKHFNYINGYPDG | 407 - 446   |
| <i>P. apiarius</i> _NRRL B-23460  | TTNPSNPAN <b>PLPPVP</b> <b>PLPPVR</b> PKLETDNHYNYINGYPDG         | 1437 - 1476 |
| <i>P. spec</i> _OSY_SE            | TTNPTNFVN <b>PLPPVP</b> <b>PLPPVR</b> PKLEMDNHYNYINGYPDG         | 342 - 380   |
| <i>P. yonginensis</i> _DCY84      | DNNVT <b>PLPPAR</b> PVT-ALPPAPPTLDKENHYNYIFGYPDG                 | 1096 - 1133 |
| <i>P. spec</i> _P1XP2             | SGSVT <b>PLPPAR</b> PVVP <b>PLPPAR</b> PKLDTANHFNYINGYPDG        | 1096 - 1133 |
| <i>P. macquariensis</i> _mac/def  | TSNPT <b>PLPPAR</b> PVVA <b>PLPPAR</b> PKLEAENHYNYINGYPDG        | 1297 - 1335 |
| <i>P. spec</i> _GM2               | SSYTPSPF <b>PAPPVP</b> <b>PLPPVR</b> PKLDTENHFDYIQGYPDG          | 1073 - 1111 |
| <i>P. antibiotiocophila</i> _GD11 | PSSSVTLPAPV <b>PLPPLE</b> AVPPVLDRENHYDYINGYPDG                  | 290 - 328   |
| <i>P. macerans</i>                | PSPSTPEVD <b>PLPPLPPL</b> EAVPPKLETENHYDYINGYPDG                 | 1100 - 1138 |
| <i>P. phoceensis</i> _MT24        | GNPTPPSTPEVT <b>PLPPLE</b> AVPPPLDLENHFQYIHGYPDG                 | 1500 - 1538 |

B

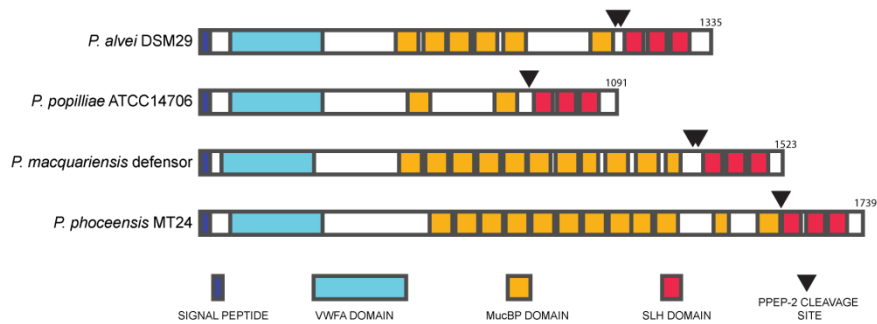

**Figure S2: Bioinformatics identification of putative PPEP-2 cleavage sites in proteins encoded by adjacent open reading frames in Paenibacillus genomes**

a) Paenibacillus species are indicated with the (putative) PPEP-2 cleavage sites (PLPPXP) highlighted in red, yellow and green. Position of protein region shown is indicated on the right

b) Schematic representation of the modular organisation of the PPEP-2 substrates VMSP (VWFA, MucBP, Surface-layer homology Protein), encoded by the gene adjacent to *ppep-2*. Black triangles indicate the (putative) PPEP-2 cleavage site (see also A). Domains are illustrated in different colours: Blue, VWFA = Von Willebrand factor type A domain (IPR002035); Orange, MucBP = Mucin-Binding Protein domain (IPR009459); Red, SLH = S-layer homology domain (IPR001119). Functional domain analysis was performed using InterPro [<http://www.ebi.ac.uk/interpro/>].

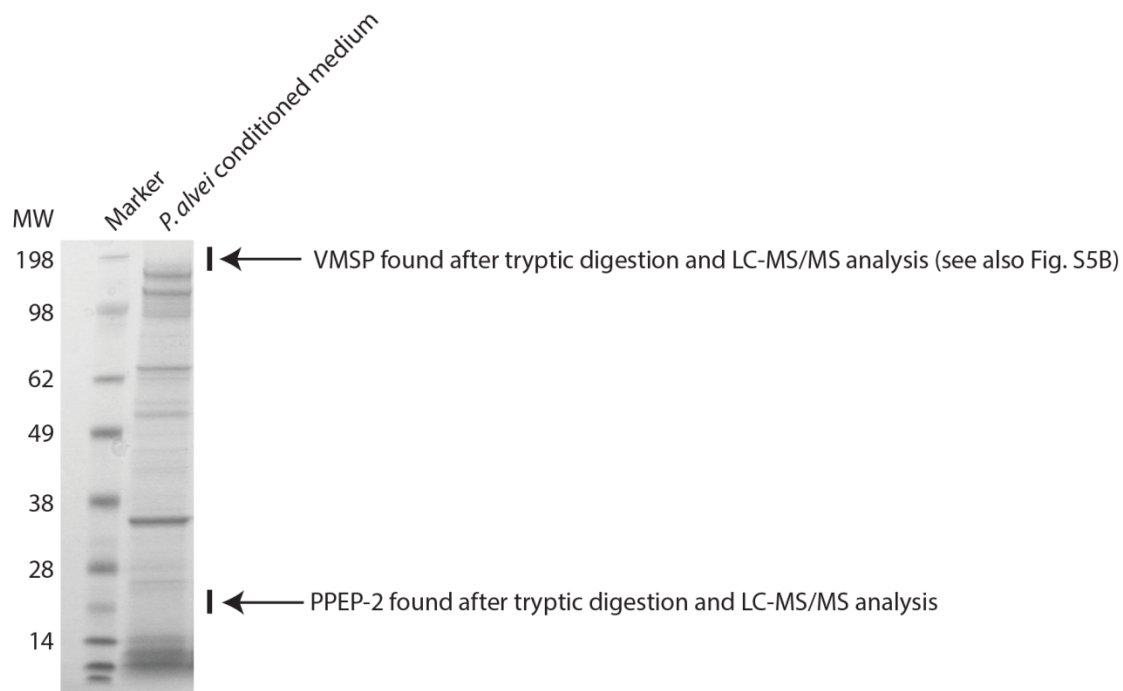

PPEP-2 identification by LC-MS/MS analysis of tryptic digests and Mascot data base searching

WP\_005543643.1 Mass: 24056 Score: 579 Matches: 21(20) Sequences: 14(14) emPAI: 21.41  
hypothetical protein [Paenibacillus alvei]

|      | Observed | Mr(expt)  | Mr(calc)  | ppm   | Miss | Score | Expect  | Rank | Unique | Peptide                          |
|------|----------|-----------|-----------|-------|------|-------|---------|------|--------|----------------------------------|
| 184  | 348.6822 | 695.3498  | 695.3490  | 1.21  | 0    | 38    | 0.0046  | 1    | U      | R.IGYSEK.G                       |
| 1126 | 480.7530 | 959.4914  | 959.4924  | -1.03 | 0    | 40    | 0.0053  | 1    | U      | A.QEQSILDK.L                     |
| 2971 | 660.8760 | 1319.7375 | 1319.7336 | 2.94  | 0    | 108   | 3e-10   | 1    | U      | K.IPTSILDALYSK.G                 |
| 3437 | 716.8299 | 1431.6452 | 1431.6414 | 2.69  | 0    | (42)  | 0.0016  | 1    | U      | K.DSMPLTYEFMAK.L                 |
| 3520 | 724.8257 | 1447.6368 | 1447.6363 | 0.34  | 0    | 58    | 3.2e-05 | 1    | U      | K.DSMPLTYEFMAK.L                 |
| 4499 | 564.3273 | 1689.9600 | 1689.9552 | 2.80  | 1    | 48    | 0.0002  | 1    | U      | R.LEKIPTSILDALYSK.G              |
| 4724 | 880.9757 | 1759.9369 | 1759.9356 | 0.73  | 0    | 71    | 2.3e-06 | 1    | U      | K.LTQGAITNEPELAYLK.G             |
| 5012 | 938.4523 | 1874.8900 | 1874.8794 | 5.65  | 1    | 66    | 9.1e-06 | 1    | U      | R.SDLKDSMPLTYEFMAK.L             |
| 5093 | 636.6329 | 1906.8770 | 1906.8692 | 4.05  | 1    | (39)  | 0.0041  | 1    | U      | R.SDLKDSMPLTYEFMAK.L             |
| 5114 | 639.3262 | 1914.9567 | 1914.9509 | 3.01  | 0    | 67    | 7.9e-06 | 1    | U      | K.LVVLPSTGEYNHSEAAAAMK.Q         |
| 5171 | 644.6575 | 1930.9508 | 1930.9458 | 2.55  | 0    | (47)  | 0.00099 | 1    | U      | K.LVVLPSTGEYNHSEAAAAMK.Q         |
| 5247 | 980.9595 | 1959.9044 | 1959.8963 | 4.13  | 0    | 57    | 5.3e-05 | 1    | U      | R.GWEGTGLTWDDVPGVSR.V            |
| 5365 | 668.0445 | 2001.1116 | 2001.1146 | -1.48 | 1    | 32    | 0.009   | 1    | U      | K.IKLTQGAITNEPELAYLK.G           |
| 5496 | 514.5168 | 2054.0380 | 2054.0293 | 4.23  | 0    | 74    | 1.6e-06 | 1    | U      | K.GHNSLNLEIHETLHAVDR.L           |
| 5970 | 757.0913 | 2268.2521 | 2268.2478 | 1.92  | 1    | 53    | 7.9e-05 | 1    | U      | K.LTQGAITNEPELAYLKGVVPR.G        |
| 6231 | 829.0903 | 2484.2492 | 2484.2398 | 3.78  | 1    | 76    | 9.6e-07 | 1    | U      | R.GWEGTGLTWDDVPGVSRVAVR.I        |
| 6496 | 947.4776 | 2839.4110 | 2839.4062 | 1.69  | 1    | 95    | 1.1e-08 | 1    | U      | A.QEQSILDKLVVLPSTGEYNHSEAAAAMK.Q |
| 6505 | 952.8104 | 2855.4093 | 2855.4011 | 2.86  | 1    | (56)  | 8.3e-05 | 1    | U      | A.QEQSILDKLVVLPSTGEYNHSEAAAAMK.Q |
| 6507 | 953.1530 | 2856.4370 | 2856.4327 | 1.51  | 1    | (32)  | 0.02    | 1    | U      | A.QEQSILDKLVVLPSTGEYNHSEAAAAMK.Q |
| 6508 | 715.1182 | 2856.4438 | 2856.4327 | 3.89  | 1    | (49)  | 0.00036 | 1    | U      | A.QEQSILDKLVVLPSTGEYNHSEAAAAMK.Q |
| 6512 | 719.1173 | 2872.4399 | 2872.4276 | 4.27  | 1    | (43)  | 0.0013  | 1    | U      | A.QEQSILDKLVVLPSTGEYNHSEAAAAMK.Q |

**Figure S3: Identification of endogenous PPEP-2 and its substrate VMSP in conditioned medium of *P. alvei* cell cultures.**

Conditioned medium from *P. alvei* cell cultures was concentrated and analyzed by SDS-PAGE (upper panel). In-gel tryptic digestion followed by LC-MS/MS analyses and database searching identified PPEP-2 (lower panel) and VMSP (Fig. S5).

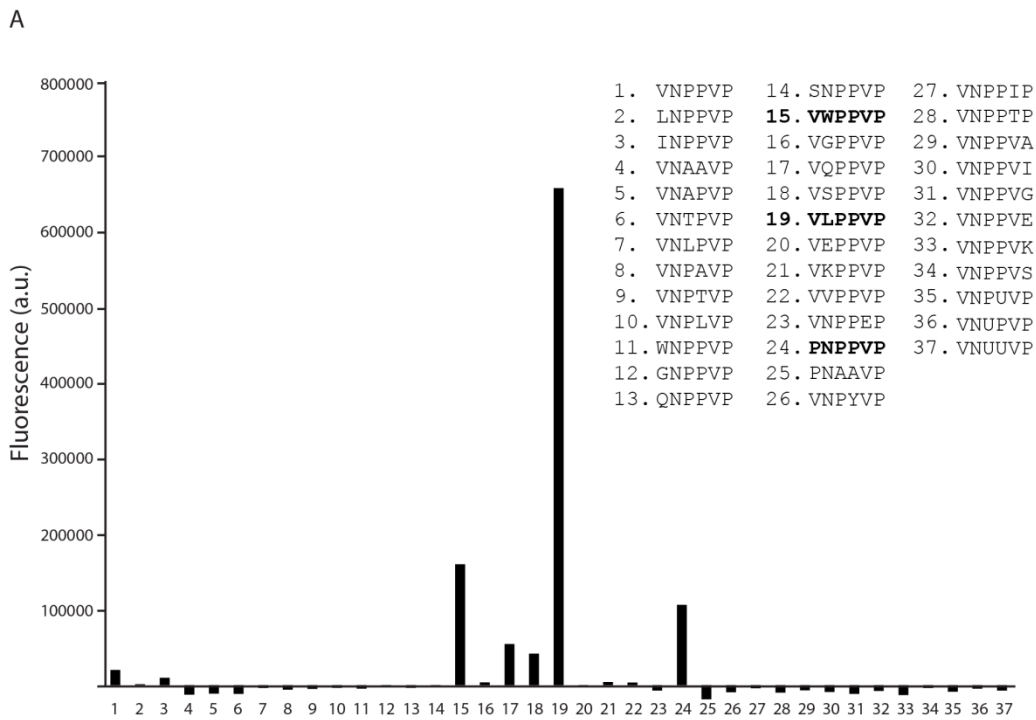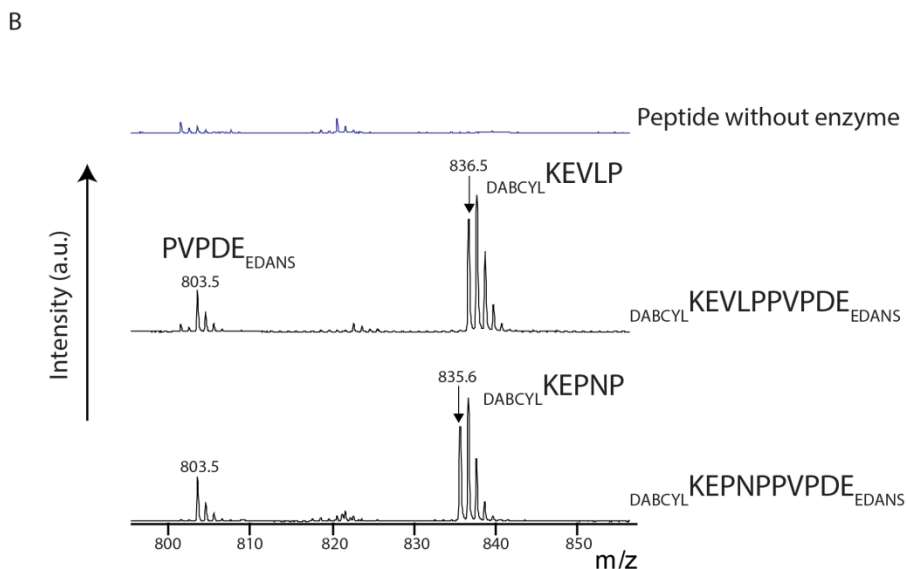

**Figure S4: Screening of a FRET substrate peptide library with PPEP-2 confirms the preference for a proline at the P3 and leucine at the P2 position of the cleavage site.**

a) A set of FRET-peptides which had previously been used to identify the optimal substrate peptide for PPEP-1 was tested with recombinant PPEP-2. The fluorescence increase after 1 h of incubation of a substrate peptide (25  $\mu$ M) with 1  $\mu$ g of PPEP-2 is shown. The core sequence of the peptides (P3-P3') is indicated. In bold, the three best cleaved peptides are indicated. U: hydroxyproline.

b) MALDI-ToF MS analysis of the cleavage products of the FRET-peptides containing the VLPPVP and PNPPVP motif after incubation with recombinant PPEP-2.

A

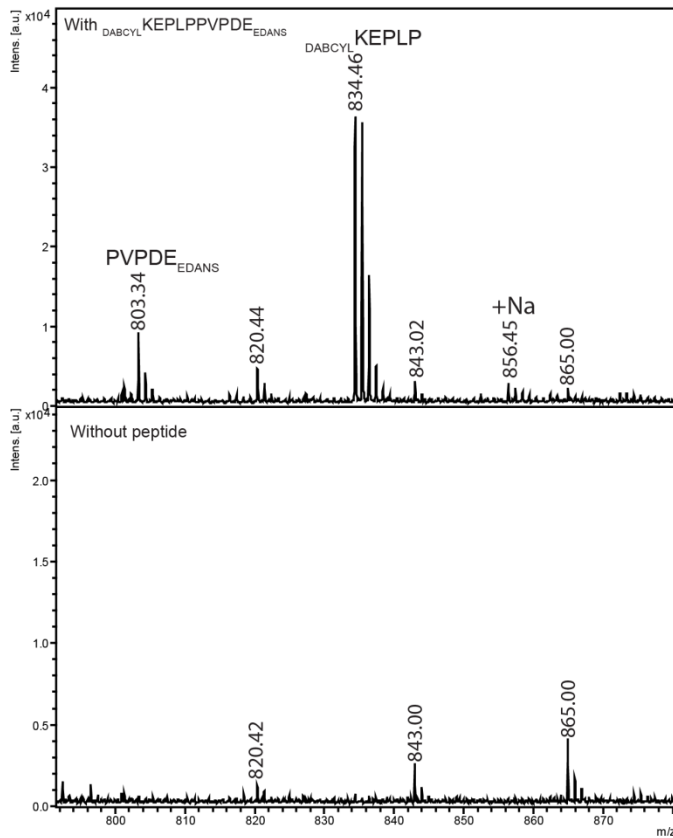

B

```

MKRRVKLAVTWLCVFAVFFGFI PHTLQSADAAAQDP IWPEPGAVKLSKTAKPTGTPGEW
QITLTAEGKNVEAGDTPVVLVLDKSDSMRSYKRLDNAKAAEK FVNTLLFS NVKTRIAL
VTFSTSS EDTSSGFLGQNDKQQLLNNI KGISASGGTNIQ SALLYTAHRLLATKSSAKNKF
IVLLSDGAPTESSPAKKAASYSWPNNKYNFVLSDFDYTK TIGSGNSYQLSSGLFGDRYT
IGNYTYV KDNIGIPTISQAKASKDAGINIYSIGLEVGNDANAVYVLKNSASANNYPSSDSA
ELEKVFSELAGKISYAAENAVVKDPMGEMFNLI FKGNA PVENQDYKVSQGTVKWDAASE
TFVWDVGNIVEGSPATLTYTIKMDSSKNPSADVNYPTNGRTTMEYTDVNQRTSKEFEV
PQVSFGKGSILVKGKVNQDQGEPI NADGKVVERVDLAEQLYSGSFTVNGKDALDIGPKY
KVPAPKLDNYVLKKGTDPEETLTIQEPNKT I WFGYALAPHKLTIKYVDRETGKSIAND
DSSLSGTIGQITL KALDIPGYTPEKTEVQYTFKADNEYTFYFKMDLPITIKFVDDK
TSKSIADDDTSHSGKVGAVTLKALDIPGYTPEKAEITYTVKATDNVVTFFYTANPQKI
TIHYIDQDTKLP IAKDSSKDGKTGESVTLTALEITGYTSVNPVVKYTF TAEANQEHTFF
YTKNAPVERTVHVHYKEADTGAVLKESTSTSGKVGETVTLKAEDITINGVVYVPNAYEH
EYTTIDKEEQSYTFPIYTKKDVIPQERTVHVHYKDAATGTVLKESTSTSGKVGATITLRA
EDITVDGVIYVPASYQHEYAVTEQTEQSYTFYFKKELPTYFVTVHHEEGTDAVLHEP
TTVSGKSGEVHVHTAEPISVADAVYQPIKFNHDITIEGTPEQLYTIYKKGEPVEPLLL
TVLHLDKETLAPLAEP TSLKKGAGEHITLKPTPI TVTDAVYNPEHAAYDYVFTGEATQT
FSILYIKNPI THPDQHVTIKYVEQGTGKQLVNPPTKNGKAGEKVELTALSISGYTFVKS
TDTYTFDKEGQEYIFYYTRNSSGGGSSGGSSSYYPSSK PLPPVPPVQPLPPVP KLET
SYHYNYINGYPDGKIKPENLISREEVAVIFYRLMENSTRANFLKGTNSYKDI AEKRWSN
RHISTMENAGIKGYPDGSLFPERPITRAEFAAIASRFDKLNEQNTMFSDISGHWAEK
YIVSAANKGWIKGYKNGTFKPNQYITRAEAMAFINSVLRKRVHNDIEHKDAKKWPDITP
TNWYYS DVM EATNYH DYHRIKDNFESWDKVNADV VYP

```

**Figure S5: Identification of endogenous PPEP-2 activity in conditioned medium of *P. alvei* cell cultures**

a) Conditioned medium from a *P. alvei* cell culture was concentrated and incubated with a FRET substrate peptide containing the sequence PLPPVP. Following a 1 h incubation, MALDI-ToF MS was used to identify the specific product peptides as a result of PPEP-2 cleavage.

b) Conditioned medium from *P. alvei* cell cultures was concentrated and analyzed by SDS-PAGE (see Fig. S2). In-gel tryptic digestion followed by LC-MS/MS analyses and database searching identified three peptides (indicated in red) from *P. alvei* DSM29 VMSP. The PPEP-2 cleavage sites are indicated in bold and the putative signal peptide in italic.



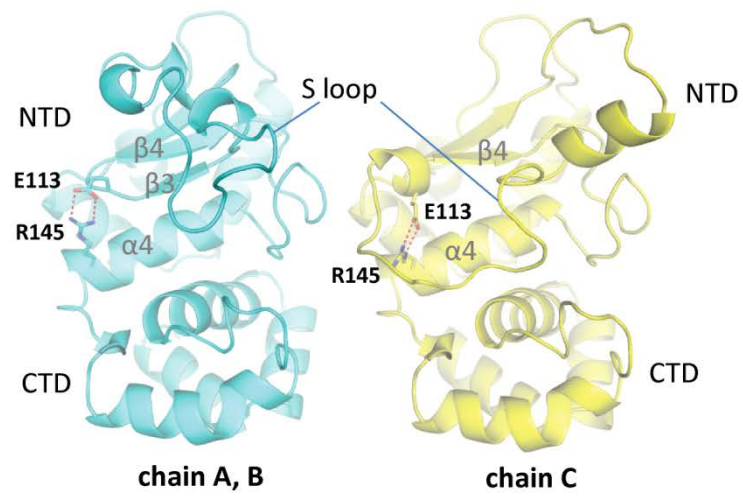

**Figure S6: Positions of the S-loop in different chains of the PPEP-2 crystal**

Different chains of the PPEP-2 crystal structure show different positions of the S-loop. The chains A through C are presented whereas chain D is not shown because of the uncertain position of the S-loop. Note that in all chains the salt bridge between Glu113 and Arg145 (shown in red dashed lines) is preserved.

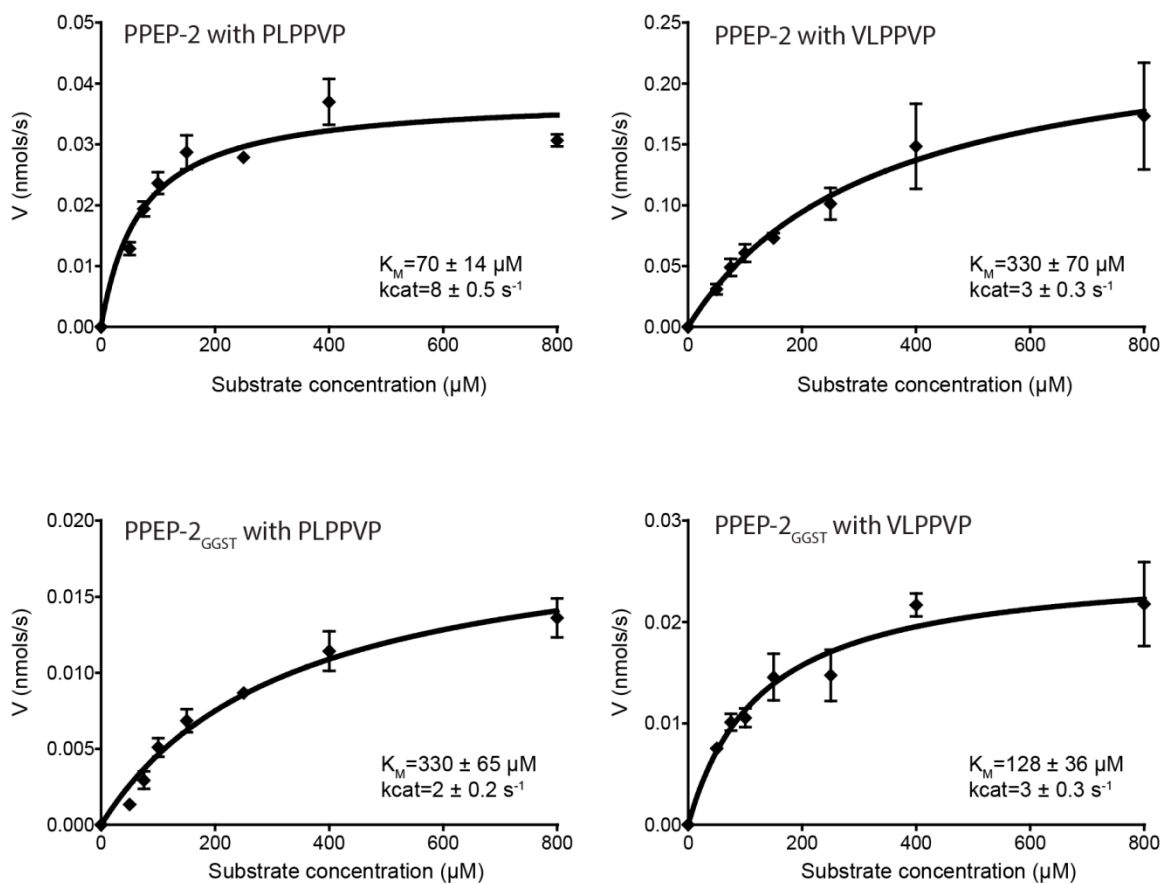

**Figure S7: The specificity of PPEP-2 can be modified towards that of PPEP-1**

A recombinant modified PPEP-2 was produced where the  $\beta 3/\beta 4$  loop from PPEP-2 (SERV) was replaced by that from PPEP-1 (GGST). Shown are the Michaelis-Menten plots for PPEP-2 and PPEP-2<sub>GGST</sub> with FRET substrate peptides containing either PLPPVP or VLPPVP. PPEP-2 (100 ng for the experiments with the PLPPVP peptide and 2  $\mu\text{g}$  for the experiments with the VLPPVP peptide) and PPEP-2<sub>GGST</sub> (200 ng for both peptides) were incubated with different concentrations of the substrate peptides. See Material and Methods for further details. A minimum of three experiments were used for the determination of the Michaelis-Menten constants.
